# Supplementary material
Source: PubMed Central journal article supplement (PMC3493849)
Supplement: NIHMS391703-supplement-1_si_001.pdf [file NIHMS391703-supplement-1_si_001.pdf]

## Supplementary Materials

# Development of Polarizable Models for Molecular Mechanical Calculations III: Polarizable Water Models Conforming to Thole Polarization Screening Schemes

Jun Wang<sup>1</sup>, Piotr Cieplak<sup>2</sup>, Qin Cai<sup>1</sup>, Meng-Juei Hsieh<sup>1</sup>,  
Junmei Wang<sup>3</sup>, Yong Duan<sup>4</sup>, and Ray Luo<sup>1,\*</sup>

<sup>1</sup>Molecular Biology and Biochemistry, University of California, Irvine, CA, 92697; <sup>2</sup>Sanford-Burnham Medical Research Institute, La Jolla, CA 92037; <sup>3</sup>Department of Pharmacology, University of Texas Southwestern Medical Center, Dallas, Texas 75390; <sup>4</sup>Genome Center and Department of Biomedical Engineering, University of California, Davis, CA 95616

Table S1. Second virial coefficients for the POL3-LT water model calculated using 3-, 5- and 7-point Gauss quadratures.

| TEMP   | 3p-Gauss | 5p-Gauss | 7p-Gauss |
|--------|----------|----------|----------|
| 273.15 | -2303.1  | -2309.5  | -2309.5  |
| 293.15 | -1493.2  | -1497.0  | -1497.0  |
| 295.15 | -1435.7  | -1439.3  | -1439.3  |
| 298.15 | -1355.2  | -1358.5  | -1358.6  |
| 323.15 | -881.4   | -883.3   | -883.3   |
| 373.15 | -455.3   | -456.0   | -456.0   |
| 423.15 | -277.8   | -278.1   | -278.1   |
| 448.15 | -225.8   | -226.1   | -226.1   |
| 473.15 | -187.1   | -187.3   | -187.3   |
| 523.15 | -134.2   | -134.3   | -134.3   |
| 573.15 | -100.2   | -100.3   | -100.3   |
| 673.15 | -60.2    | -60.2    | -60.2    |
| 773.15 | -38.0    | -38.0    | -38.0    |
| 873.15 | -24.2    | -24.2    | -24.2    |
| 973.15 | -14.9    | -14.9    | -14.9    |
| 1000   | -12.9    | -12.9    | -12.9    |
| 1100   | -6.9     | -6.9     | -6.9     |
| 1200   | -2.4     | -2.4     | -2.4     |
| 1300   | 1.0      | 1.0      | 1.0      |
| 1400   | 3.7      | 3.7      | 3.7      |

Table S2. Comparison between simulations with different number of water molecules and cutoff.

| Model        | $\rho$       | $\Delta H_{vap}$ | $D$      | $\epsilon_0$ |
|--------------|--------------|------------------|----------|--------------|
| POL3(small)  | 1.002(0.000) | 10.46(0.00)      | 2.4(0.1) | 125(2)       |
| POL3 (large) | 1.001(0.000) | 10.45(0.00)      | 2.5(0.1) | 126(3)       |

Densities ( $\rho$ , g/cm<sup>3</sup>), enthalpies of vaporization ( $\Delta H_{vap}$ , kcal/mol), diffusion constants ( $D$ , 10<sup>-9</sup> m<sup>2</sup>/s), dielectric constants ( $\epsilon_0$ ) for the POL3 water model at 298 K and 1 atm. Small: No<sub>water</sub> = 499, cutoff = 9 Å; Large: No<sub>water</sub> = 2031, cutoff = 15 Å. The numbers in parentheses are the standard deviations.

Table S3. Self-diffusion coefficients of water models at 200K, 230K, and 298K.

| Model      | 200K       | 230K       | 298K     |
|------------|------------|------------|----------|
| POL3       | 0.01(0.00) | 0.17(0.01) | 2.4(0.1) |
| POL3-LT    | 0.01(0.00) | 0.16(0.00) | 2.5(0.1) |
| POL3-ET    | 0.01(0.00) | 0.17(0.01) | 2.6(0.1) |
| DA/DA-LT   | 0.01(0.00) | 0.08(0.00) | 1.8(0.0) |
| DA-ET      | 0.01(0.00) | 0.08(0.00) | 1.9(0.1) |
| NDA/NDA-LT | 0.01(0.00) | 0.23(0.01) | 2.7(0.0) |
| NDA-ET     | 0.01(0.00) | 0.24(0.01) | 2.7(0.0) |
| DC/DC-LT   | 0.01(0.00) | 0.09(0.01) | 2.3(0.1) |
| DC-ET      | 0.01(0.00) | 0.09(0.00) | 2.4(0.1) |

Table S4. Second virial coefficient for polarizable water models studied in this work.

| TEMP     | EXP.    | POL3    | POL3-LT | POL3-ET | DC/DC-LT | DA/DA-LT/ET | NDA/NDA-LT/ET | TIP4P   | CC-pol  |
|----------|---------|---------|---------|---------|----------|-------------|---------------|---------|---------|
| 273.15   | -1916.9 | -2310.3 | -2309.5 | -2310.2 | -1187.1  | -1923.9     | -1790.9       | -7647.5 | -2360.8 |
| 293.15   | -1307.8 | -1497.5 | -1497   | -1497.5 | -834.4   | -1277.6     | -1200.5       | -4428.3 | -1572.0 |
| 295.15   | -1262.9 | -1439.8 | -1439.3 | -1439.7 | -807.9   | -1230.9     | -1157.6       | -4213.8 | -1514.9 |
| 298.15   | -1199.7 | -1359   | -1358.5 | -1359   | -770.5   | -1165.4     | -1097.3       | -3917.5 | -1434.6 |
| 323.15   | -816.7  | -883.6  | -883.3  | -883.5  | -539.4   | -773.9      | -735.1        | -2275   | -954.4  |
| 373.15   | -451.6  | -456.2  | -456    | -456.2  | -307.4   | -410.6      | -394.7        | -995.1  | -507.8  |
| 423.15   | -289.9  | -278.2  | -278.1  | -278.2  | -198.8   | -254.5      | -246.4        | -544.6  | -316.2  |
| 448.15   | -240.6  | -226.1  | -226.1  | -226.1  | -164.9   | -208.0      | -201.9        | -425.6  | -259.4  |
| 473.15   | -203.2  | -187.4  | -187.3  | -187.4  | -138.8   | -173.2      | -168.4        | -341.6  | -216.9  |
| 523.15   | -150.5  | -134.3  | -134.3  | -134.3  | -101.7   | -125        | -121.9        | -233.7  | -158.3  |
| 573.15   | -115.7  | -100.3  | -100.3  | -100.3  | -76.9    | -93.8       | -91.6         | -169.4  | -120.5  |
| 673.15   | -73.6   | -60.2   | -60.2   | -60.2   | -46.4    | -56.7       | -55.4         | -99.2   | -75.8   |
| 773.15   | -49.7   | -38.0   | -38.0   | -38.0   | -28.8    | -35.9       | -35.0         | -63.0   | -50.8   |
| 873.15   | -34.6   | -24.2   | -24.2   | -24.2   | -17.6    | -22.9       | -22.2         | -41.6   | -35.2   |
| 973.15   | -24.4   | -14.9   | -14.9   | -14.9   | -9.9     | -14.0       | -13.5         | -27.8   | -24.6   |
| 1000     | -22.2   | -12.9   | -12.9   | -12.9   | -8.2     | -12.2       | -11.6         | -24.9   | -22.4   |
| 1100     | -15.5   | -6.9    | -6.9    | -6.9    | -3.1     | -6.4        | -5.9          | -16.2   | -15.4   |
| 1200     | -10.4   | -2.4    | -2.4    | -2.4    | 0.8      | -2.0        | -1.6          | -9.9    | -10.2   |
| 1300     | -6.5    | 1.0     | 1.0     | 1.0     | 3.7      | 1.3         | 1.7           | -5.1    | -6.2    |
| 1400     | -3.4    | 3.7     | 3.7     | 3.7     | 6.1      | 3.9         | 4.3           | -1.4    | -3.0    |
| $\chi^2$ |         | 216.4   | 215.6   | 216.3   | 1117.8   | 87.9        | 143.4         | 41434.9 | 288.2   |

Comparison with experimental data, measured by  $\chi^2$  value defined in the main text.

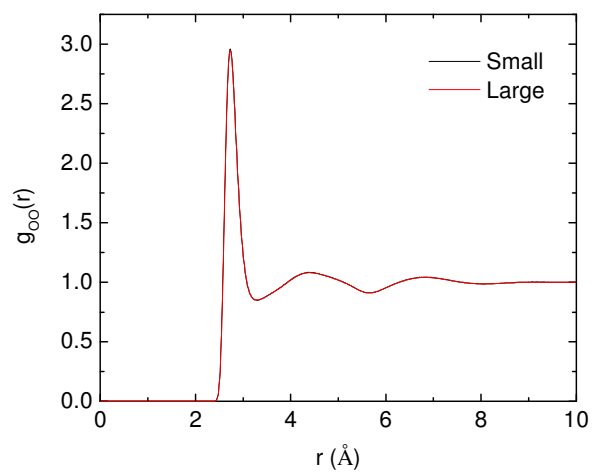

Figure S1. Radial distribution functions of the POL3 water model generated by different simulations with different number of water molecules and cutoff. Small:  $N_{\text{water}} = 499$ , cutoff = 9  $\text{\AA}$ ; Large:  $N_{\text{water}} = 2031$ , cutoff = 15  $\text{\AA}$ .

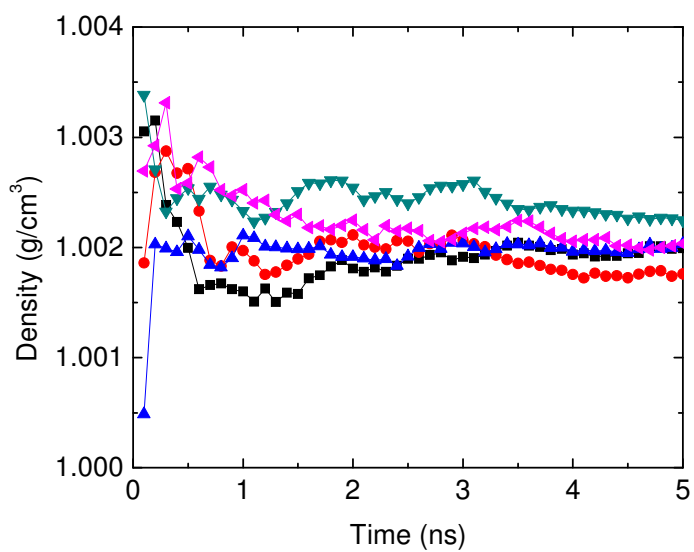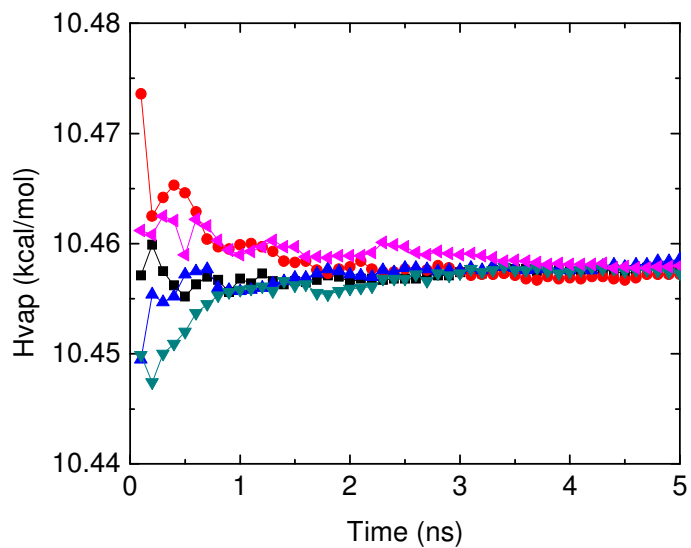

Figure S2. Cumulative averages of Density and Hvap of the POL3 model ( $N_{\text{water}} = 499$ , cutoff = 9 Å). Here different colors represent different trajectories. The final values are averaged over all five trajectories.

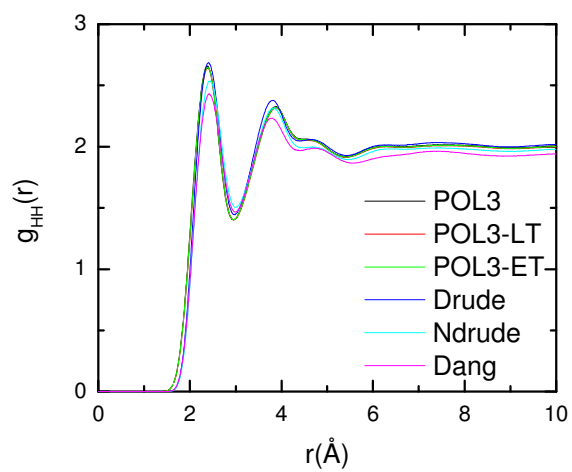

Figure S3. Comparison of simulated radial distribution functions  $g_{HH}(r)$  for tested polarizable water models.



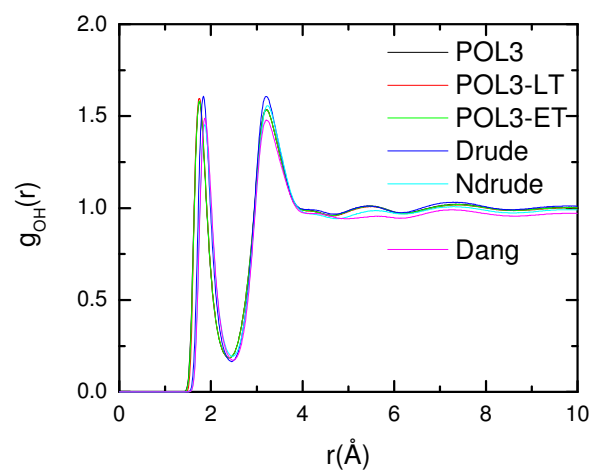

Figure S4. Comparison of simulated radial distribution functions  $g_{OH}(r)$  for tested polarizable water models.

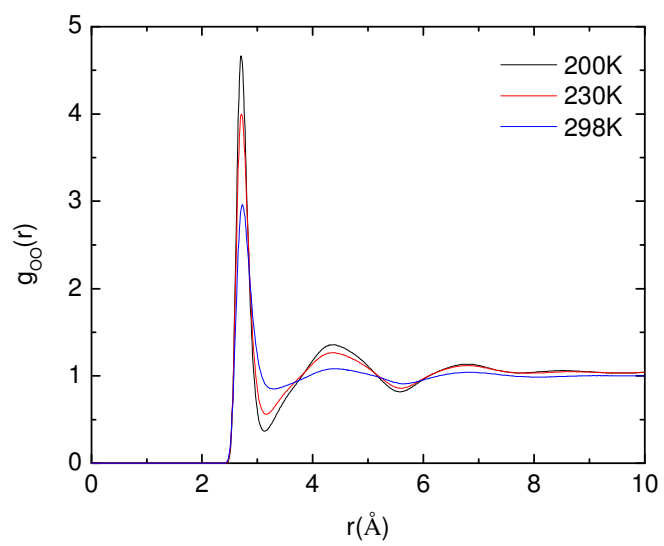

Figure S5. Comparison of simulated radial distribution functions  $g_{oo}(r)$  at three simulated temperatures for the POL3 water model.

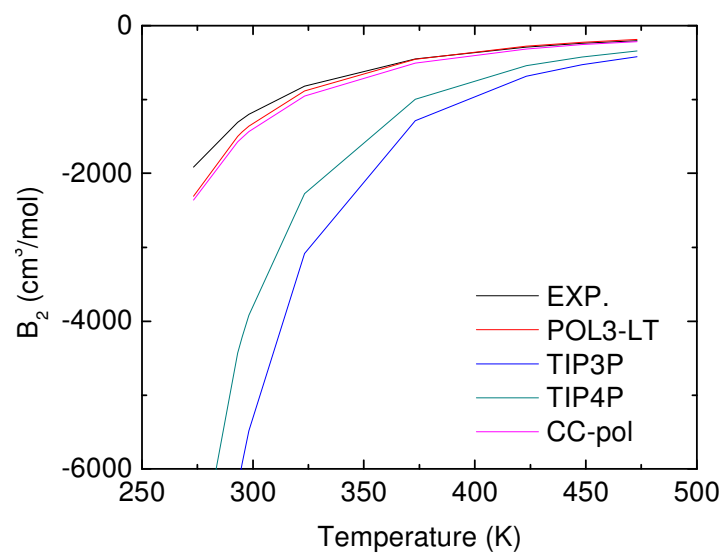

Figure S6. The second virial coefficients as a function of temperature. Comparison of POL3-LT with two popular TIP3P and TIP4P additive models and quantum mechanical CC-pol model.
